# Supplementary material for: Effective ribosomal RNA depletion for single-cell total RNA-seq by scDASH
Source: PeerJ journal article supplement (doi:10.7717/peerj.10717), 2021-01-15
Supplement: Supplemental_Table_S1.docx [file Supplemental_Table_S1.docx]

**Supplemental Table S1. sgRNA sequence**

| **Target gene** | **Strand** | **Sequence** |
| --- | --- | --- |
| 18S | + | CGGTACAGTGAAACTGCGAA |
| 18S | + | TAGAGCTAATACATGCCGAC |
| 18S | - | TCTAGAGTCACCAAAGCCGC |
| 18S | + | CATGGTGACCACGGGTGACG |
| 18S | + | AATTACCCACTCCCGACCCG |
| 18S | + | TTTAACGAGGATCCATTGGA |
| 18S | - | GGCGGTGGCTCGCCTCGCGG |
| 18S | + | TCTTAGCTGAGTGTCCCGCG |
| 18S | + | GGAATAATGGAATAGGACCG |
| 18S | + | ATTCTTGGACCGGCGCAAGA |
| 18S | - | GTTTATGGTCGGAACTACGA |
| 18S | + | CCAAAGTCTTTGGGTTCCGG |
| 18S | - | TGTCAATCCTGTCCGTGTCC |
| 18S | + | TCCGATAACGAACGAGACTC |
| 18S | - | TGTTATTGCTCAATCTCGGG |
| 18S | + | AGCGTGTGCCTACCCTACGC |
| 18S | - | CAATCGGTAGTAGCGACGGG |
| 18S | + | GGTCGAACTTGACTATCTAG |
| 5.8S | + | ACTCTTAGCGGTGGATCACT |
| 5.8S | + | CGAGAATTAATGTGAATTGC |
| 28S | - | GGGTCGCCACGTCTGATCTG |
| 28S | + | TCAGTAACGGCGAGTGAACA |
| 28S | + | GGACGGTGTGAGGCCGGTAG |
| 28S | + | ATAGTCAACAAGTACCGTAA |
| 28S | + | GCCCGGAGGATTCAACCCGG |
| 28S | + | GCAGCACTCGCCGAATCCCG |
| 28S | - | CTCGCGGGGGATTCCCCGCG |
| 28S | - | GTGGGAGAGCGGTCGCGCCG |
| 28S | - | CTCTTCGGGGGACGCGCGCG |
| 28S | + | CTAACACGTGCGCGAGTCGG |
| 28S | + | AGGCCTCTCCAGTCCGCCGA |
| 28S | + | ACTCTGGTGGAGGTCCGTAG |
| 28S | - | ATCCTGAGGGAAACTTCGGA |
| 28S | - | AGAATAGGTTGAGATCGTTT |
| 28S | - | AGGCACTCGCATTCCACGCC |
| 28S | + | TGATATAGACAGCAGGACGG |
| 28S | + | GCCGGCAGTCGAGAGTGGAC |
| 28S | - | GTCGCGGCGTAGCGTCCGCG |
| 28S | + | AGCCTTGAAGCCTAGGGCGC |
| 28S | - | CGATCGGCCGAGGGCAACGG |
| 28S | + | CCGATCCCGGAGAAGCCGGC |
| 28S | + | GGAAAGCGTCGCGGTTCCGG |
| 28S | + | GGTAAGGGAAGTCGGCAAGC |
| 28S | - | GCTGGGGCGATCCACGGGAA |
| 28S | - | CGCGCGCGCGACGAGACGTG |
| 28S | - | CTAAGTCGGCTGCTAGGCGC |
| 28S | - | CATCGCGTCAACACCCGCCG |
| 28S | - | GCGTCACTAATTAGATGACG |
| 28S | + | CGGGCTTGGCGGAATCAGCG |
| 28S | - | TATTTCACCGGCGGCCCGCA |
| 28S | + | GGTGTCCTAAGGCGAGCTCA |
| 28S | + | GAATACAGACCGTGAAAGCG |
| 28S | - | TGGGTGAACAATCCAACGCT |
| 28S | + | CTCAGTACGAGAGGAACCGC |
| 28S | - | GCTGCCGTATCGTTCCGCCT |
| 28S | - | CGCCCCGTTTCCCAGGACGA |
| 28S | - | AGAAGCAGGTCGTCTACGAA |
| 28S | + | GAAAGTCAGCCCTCGACACA |
