# Supplementary material for: Effective ribosomal RNA depletion for single-cell total RNA-seq by scDASH
Source: PeerJ journal article supplement (doi:10.7717/peerj.10717), 2021-01-15
Supplement: Supplemental_Table_S2.docx [file Supplemental_Table_S2.docx]

**Supplemental Table S2. Primers for quantitative PCR**

| **Target gene** | **Forward primer** | **Reverse primer** | **Corresponding sgRNA** |
| --- | --- | --- | --- |
| 18S | TTGTCTCAAAGATTAAGCCATGC | ATCCAAGTAGGAGAGGAGCGAG | CGGTACAGTGAAACTGCGAA |
| 18S | CAATACAGGACTCTTTCGAGGC | CGAGCTTTTTAACTGCAGCAAC | TTTAACGAGGATCCATTGGA |
| 18S | GATGCTCTTAGCTGAGTGTCCC | CCCTCTTAATCATGGCCTCAGT | GGAATAATGGAATAGGACCG |
| 18S | ATCAGATACCGTCGTAGTTCCG | GTGTTGAGTCAAATTAAGCCGC | CCAAAGTCTTTGGGTTCCGG |
| 18S | CTTAAAGGAATTGACGGAAGGG | TCGTTCGTTATCGGAATTAACC | TGTCAATCCTGTCCGTGTCC |
| 18S | ACCGATTGGATGGTTTAGTGAG | GATCCTTCCGCAGGTTCAC | GGTCGAACTTGACTATCTAG |
| 5.8S | TGAGGCAACCCCCTCTCCTC | GTGCGTTCGAAGTGTCGATGATC | ACTCTTAGCGGTGGATCACT |
| 5.8S | GCCCTCGCCAAATCGACCTC | GATCGGCAAGCGACGCTCAG | CGAGAATTAATGTGAATTGC |
| 28S | CTTCCCGGAGTCGGGTTGCTTG | GAATCCTCCGGGCGGACTGC | ATAGTCAACAAGTACCGTAA |
| 28S | TCCCTCAGGATAGCTGGCGCTC | GTGGCCCACTAGGCACTCGC | AGAATAGGTTGAGATCGTTT |
| 28S | CGGGCCCTTCCCGTGGATC | GTAGGGCGGGGGGACGAA | CGCGCGCGCGACGAGACGTG |
| 28S | CTCAGTACGAGAGGAACCGCAGG | GACCGGCTATCCGAGGCCAA | GCTGCCGTATCGTTCCGCCT |
