# Supplementary figures and images for: Effective ribosomal RNA depletion for single-cell total RNA-seq by scDASH
Source: PeerJ journal article supplement (doi:10.7717/peerj.10717), 2021-01-15

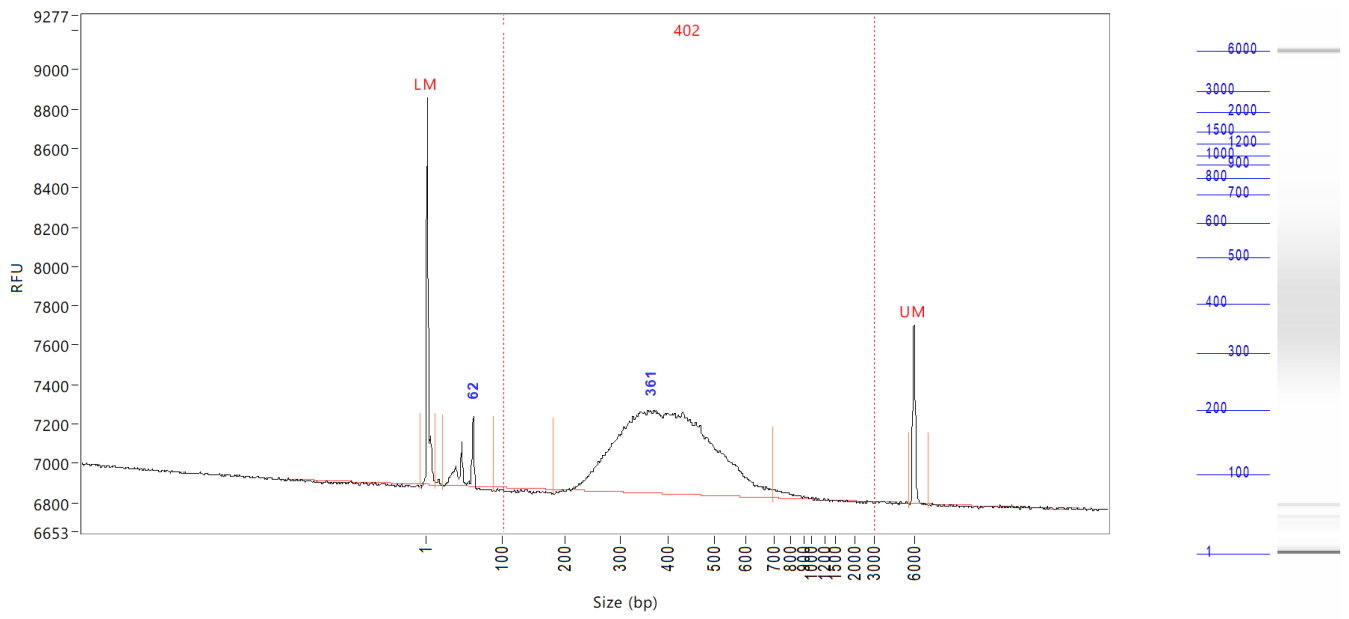

Supplement: Supplemental_Figure_S1.pdf [file Supplemental_Figure_S1.pdf]

**A**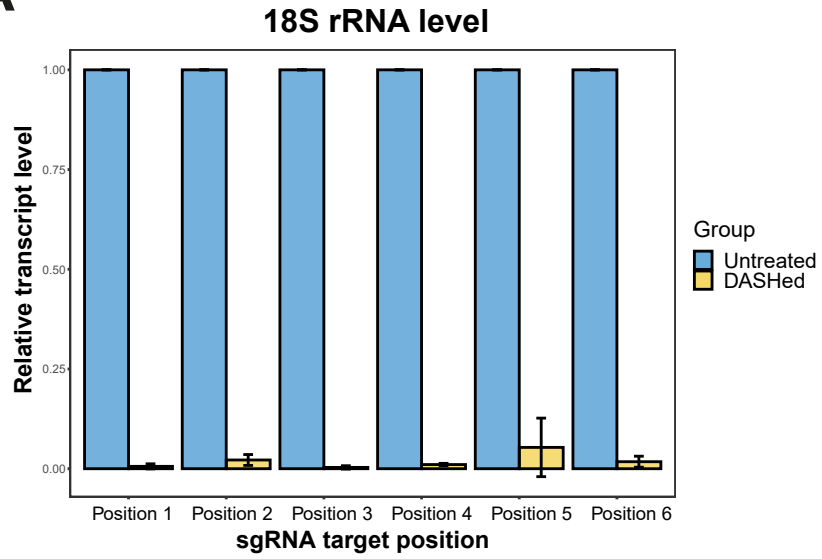**B**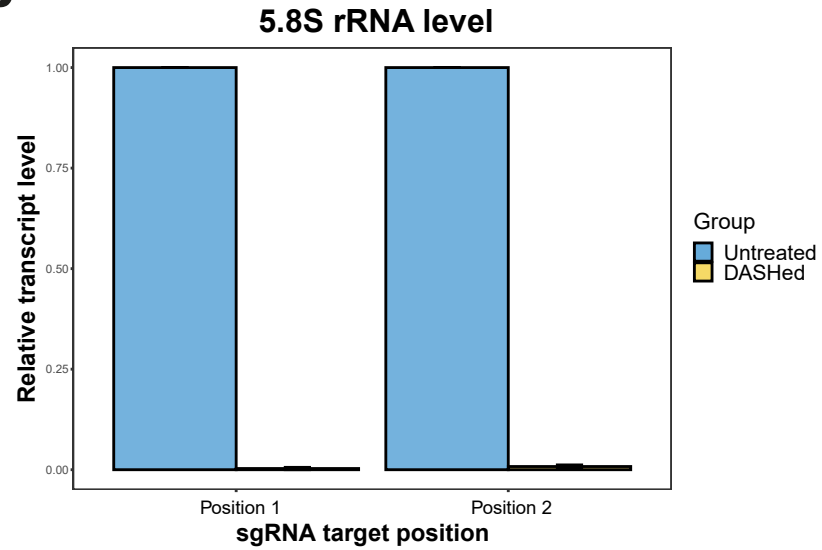**C**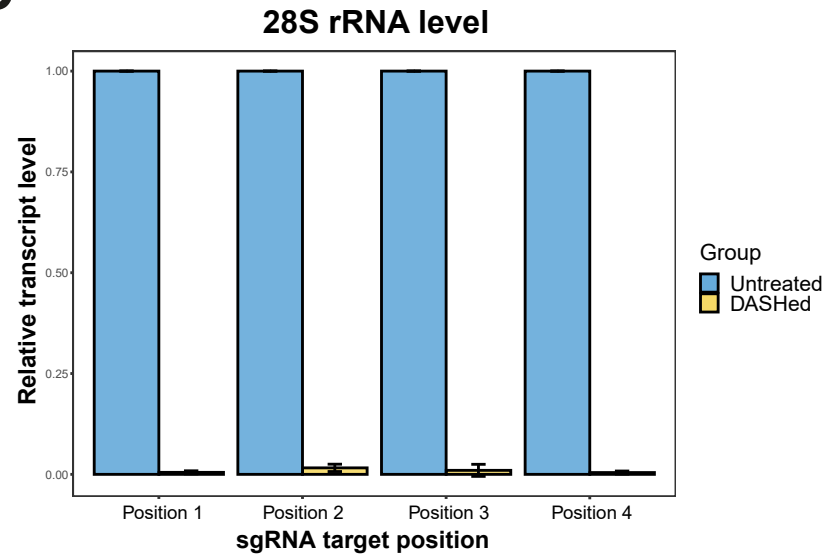

Supplement: Supplemental_Figure_S2.pdf [file Supplemental_Figure_S2.pdf]

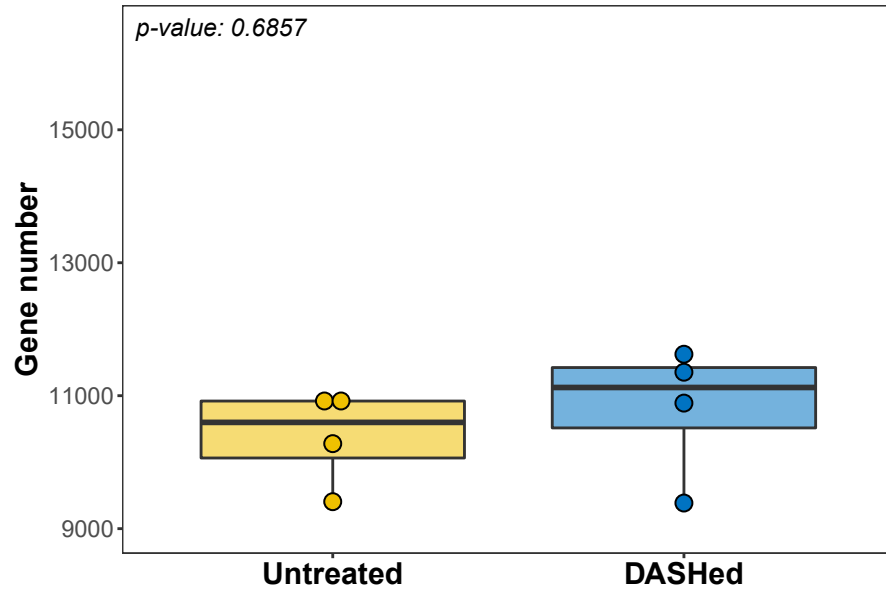

Supplement: Supplemental_Figure_S3.pdf [file Supplemental_Figure_S3.pdf]

**A**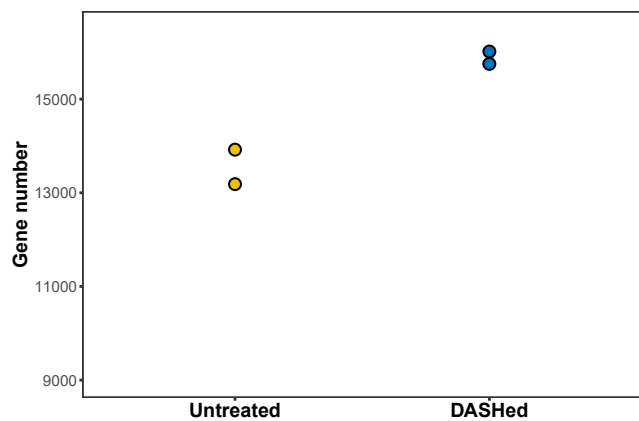**B**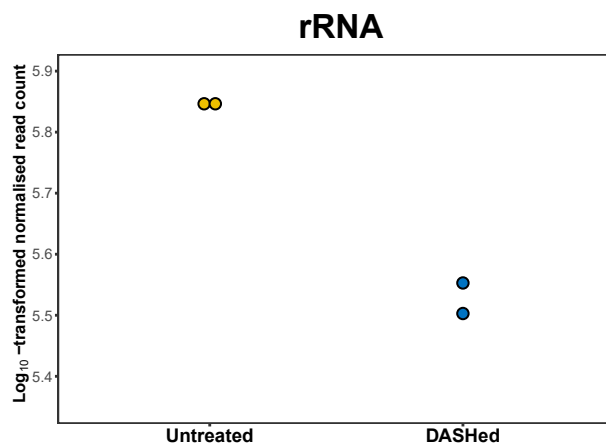**C**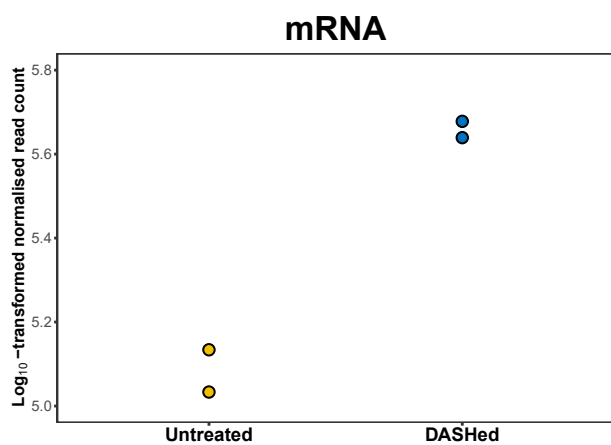**D**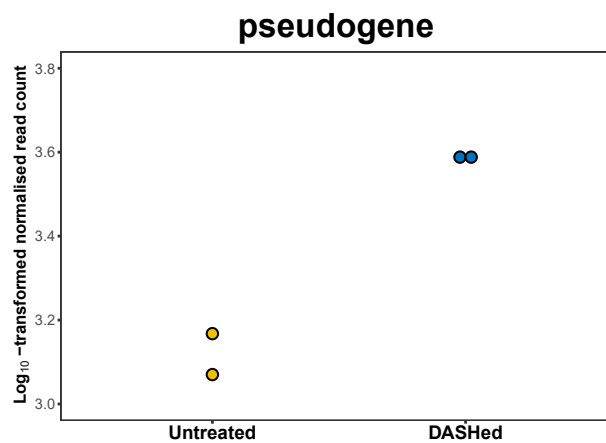**E**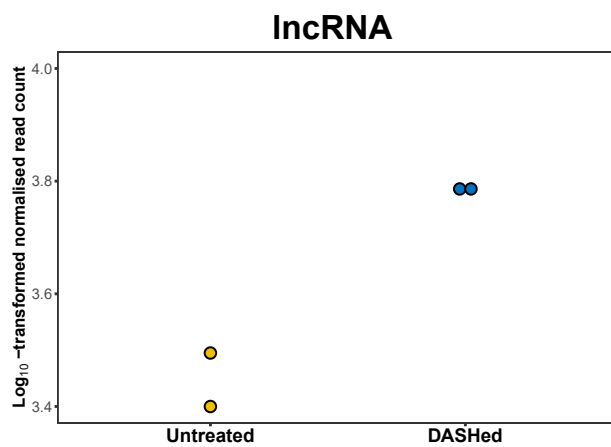**F**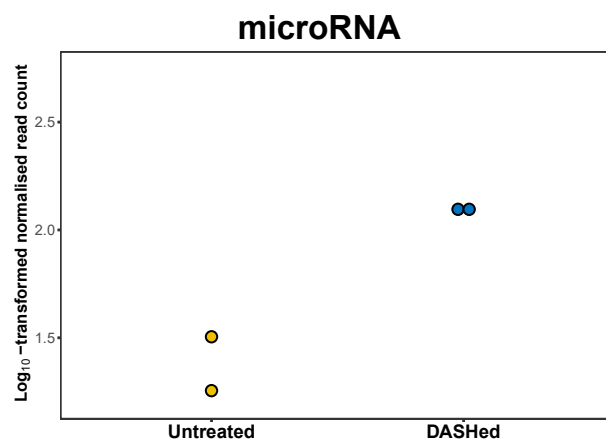

Supplement: Supplemental_Figure_S4.pdf [file Supplemental_Figure_S4.pdf]
